# Supplementary material
Source: MDPI journal article supplement (https://www.mdpi.com/2297-8739/10/3/198)
Supplement: s1 [file s1]

*Supplementary Materials*

# **Comparative GC Analysis, Bronchodilator Effect and the Detailed Mechanism of Their Main Component; Cinnamaldehyde of Three Cinnamon Species**

**Najeeb Ur Rehman <sup>1,\*</sup>, Faisal F. Albaqami <sup>1</sup>, Mohammad Ayman A. Salkini <sup>2</sup>, Nouredin M. Farahat <sup>3</sup>,  
Hatim H. Alharbi <sup>4</sup>, Saad M. Almuqrin <sup>4</sup>, Maged S. Abdel-Kader <sup>2,3</sup> and Asmaa E. Sherif <sup>2,5</sup>**

<sup>1</sup> Department of Pharmacology & Toxicology, College of Pharmacy, Prince Sattam Bin Abdulaziz University, Al-Kharj 11942, Saudi Arabia

<sup>2</sup> Department of Pharmacognosy, College of Pharmacy, Prince Sattam Bin Abdulaziz University, Al-Kharj 11942, Saudi Arabia

<sup>3</sup> Department of Pharmacognosy, Faculty of Pharmacy, Alexandria University, Alexandria 21215, Egypt

<sup>4</sup> College of Pharmacy, Prince Sattam Bin Abdulaziz University, Al-Kharj 11942, Saudi Arabia

<sup>5</sup> Department of Pharmacognosy, Faculty of Pharmacy, Mansoura University, Mansoura 35516, Egypt

\* Correspondence: n.rehman@psau.edu.sa; Tel.: +966-537192380 or +966-545539145

## Table of contents

| Title                                                                                                                                                                             | Page |
|-----------------------------------------------------------------------------------------------------------------------------------------------------------------------------------|------|
| <b>Table S1.</b> <sup>1</sup> H and <sup>13</sup> C-NMR data in ppm (multiplicity, <i>J</i> in parentheses in Hz) of <b>1</b> , <b>2</b> and <b>4</b> in CD <sub>3</sub> OD ..... | 3    |
| <b>Figure S1.</b> <sup>1</sup> HNMR spectrum of <b>1</b> .....                                                                                                                    | 4    |
| <b>Figure S2.</b> <sup>1</sup> HNMR spectrum of <b>1</b> (Exp.).....                                                                                                              | 4    |
| <b>Figure S3.</b> <sup>13</sup> CNMR spectrum of <b>1</b> . ....                                                                                                                  | 5    |
| <b>Figure S4.</b> <sup>13</sup> CNMR spectrum of <b>1</b> (Exp.). ....                                                                                                            | 5    |
| <b>Figure S5.</b> DEPT135 spectrum of <b>1</b> . ....                                                                                                                             | 6    |
| <b>Figure S6.</b> COSY spectrum of <b>1</b> . ....                                                                                                                                | 6    |
| <b>Figure S7.</b> HSQC spectrum of <b>1</b> . ....                                                                                                                                | 7    |
| <b>Figure S8.</b> <sup>1</sup> HNMR spectrum of <b>2</b> . ....                                                                                                                   | 8    |
| <b>Figure S9.</b> <sup>1</sup> HNMR spectrum of <b>2</b> (Exp.). ....                                                                                                             | 8    |
| <b>Figure S10.</b> <sup>13</sup> CNMR spectrum of <b>2</b> . ....                                                                                                                 | 9    |
| <b>Figure S11.</b> DEPT135 spectrum of <b>2</b> . ....                                                                                                                            | 9    |
| <b>Figure S12.</b> COSY spectrum of <b>2</b> . ....                                                                                                                               | 10   |
| <b>Figure S13.</b> COSY spectrum of <b>2</b> (Exp.). ....                                                                                                                         | 10   |
| <b>Figure S14.</b> HSQC spectrum of <b>2</b> . ....                                                                                                                               | 11   |
| <b>Figure S15.</b> HSQC spectrum of <b>2</b> (Exp.). ....                                                                                                                         | 11   |
| <b>Figure S16.</b> GC chromatogram of <b>2</b> . ....                                                                                                                             | 12   |
| <b>Figure S17.</b> HRESIMS spectrum of <b>2</b> (A): Negative mode, (B): Positive mode. ....                                                                                      | 12   |
| <b>Figure S18.</b> <sup>1</sup> HNMR spectrum of <b>4</b> . ....                                                                                                                  | 13   |
| <b>Figure S19.</b> <sup>1</sup> HNMR spectrum of <b>4</b> (Exp.). ....                                                                                                            | 13   |
| <b>Figure S20.</b> <sup>13</sup> CNMR spectrum of <b>4</b> . ....                                                                                                                 | 14   |
| <b>Figure S21.</b> DEPT135 spectrum of <b>4</b> . ....                                                                                                                            | 14   |
| <b>Figure S22.</b> COSY spectrum of <b>4</b> . ....                                                                                                                               | 15   |
| <b>Figure S23.</b> COSY spectrum of <b>4</b> (Exp.). ....                                                                                                                         | 15   |
| <b>Figure S24.</b> HSQC spectrum of <b>4</b> . ....                                                                                                                               | 16   |
| <b>Figure S25.</b> GC/MS spectrum of <b>4</b> . ....                                                                                                                              | 16   |

**Table S1.**  $^1\text{H}$  and  $^{13}\text{C}$ -NMR data in ppm (multiplicity,  $J$  in parentheses in Hz) of **1**, **2** and **4** in  $\text{CD}_3\text{OD}$ .

|          | <b>1</b>                |                 | <b>2*</b>               |                 | <b>4**</b>              |                 |
|----------|-------------------------|-----------------|-------------------------|-----------------|-------------------------|-----------------|
|          | $^1\text{H}$            | $^{13}\text{C}$ | $^1\text{H}$            | $^{13}\text{C}$ | $^1\text{H}$            | $^{13}\text{C}$ |
| <b>1</b> | -                       | 134.16          | -                       | 136.34          | -                       | 137.03          |
| <b>2</b> | 7.53 (m)                | 128.51          | 7.35 (d, $J=7.5$ )      | 126.38          | 7.38 (d, $J=7.5$ )      | 126.15          |
| <b>3</b> | 7.36 (m)                | 128.90          | 7.28 (t, $J=7.3$ )      | 128.41          | 7.29 (t, $J=7.3$ )      | 128.31          |
| <b>4</b> | 7.36 (m)                | 131.12          | 7.36 (t, $J=7.3$ )      | 127.80          | 7.20 (t, $J=7.3$ )      | 127.23          |
| <b>5</b> | 7.36 (m)                | 128.51          | 7.28 (t, $J=7.3$ )      | 128.41          | 7.29 (t, $J=7.3$ )      | 128.31          |
| <b>6</b> | 7.53 (m)                | 128.90          | 7.35 (d, $J=7.5$ )      | 126.38          | 7.38 (d, $J=7.5$ )      | 126.15          |
| <b>7</b> | 7.49 (d, $J=16$ )       | 153.40          | 6.60 (d, $J=16$ )       | 133.75          | 6.61 (d, $J=16$ )       | 130.28          |
| <b>8</b> | 6.67 (dd, $J=7.8, 16$ ) | 128.15          | 6.25 (dt, $J=6.4, 16$ ) | 123.11          | 6.35 (dt, $J=6.4, 16$ ) | 128.66          |
| <b>9</b> | 9.59 (d, $J=7.8$ )      | 194.49          | 4.66 (d, $J=6.3$ )      | 64.81           | 4.23 (d, $J=6.3$ )      | 62.39           |

\*  $\text{COCH}_3$ :  $\delta_{\text{H}}$  2.03,  $\text{COCH}_3$ :  $\delta_{\text{C}}$  19.76, 171.13 ppm.

\*\* OH:  $\delta_{\text{H}}$  4.90 ppm.

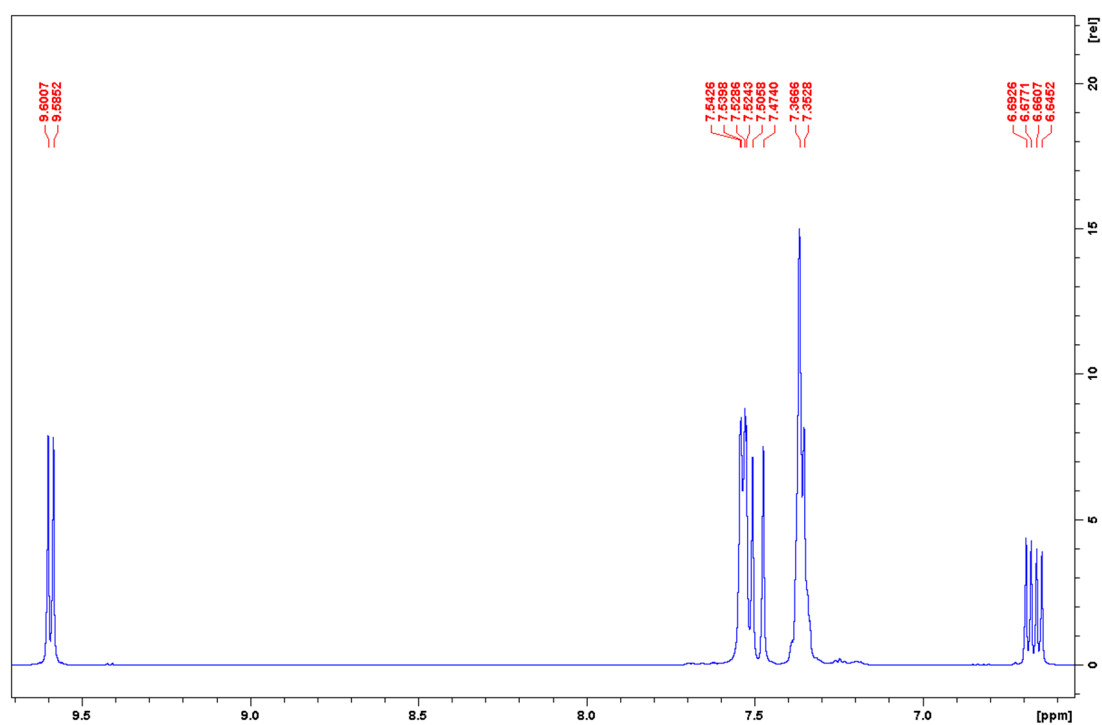

Figure S1.  $^1\text{H}$ NMR spectrum of 1.

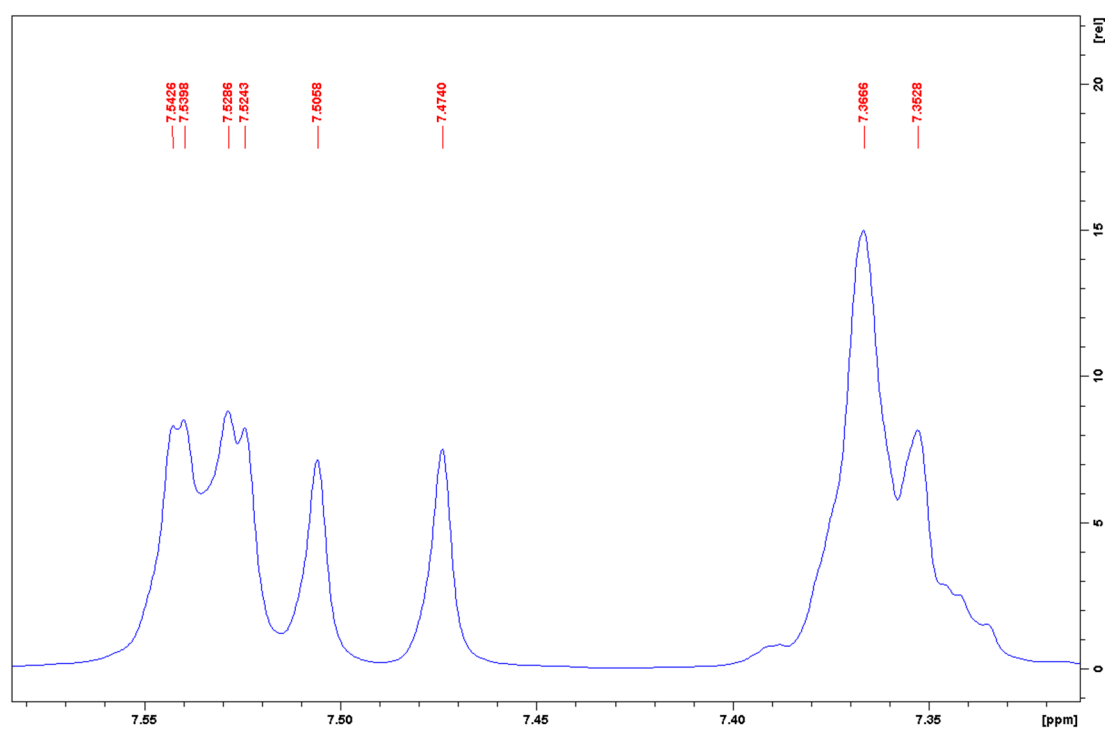

Figure S2.  $^1\text{H}$ NMR spectrum of 1 (Exp.).

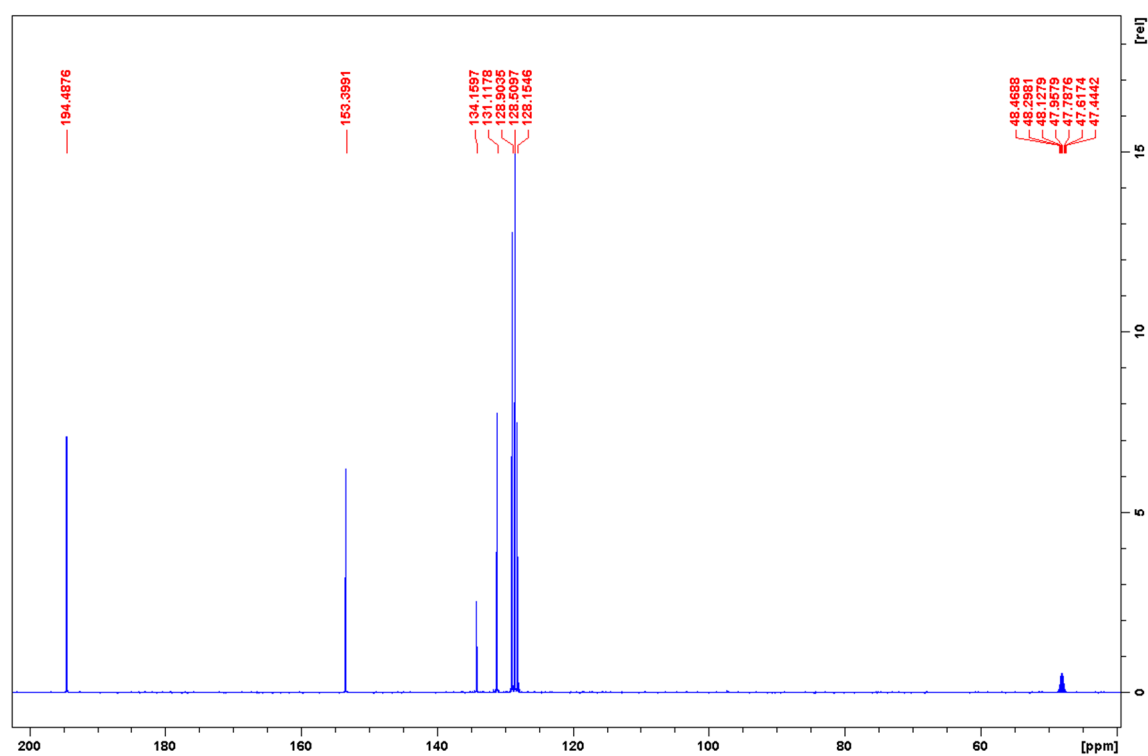

Figure S3.  $^{13}\text{C}$  NMR spectrum of 1.

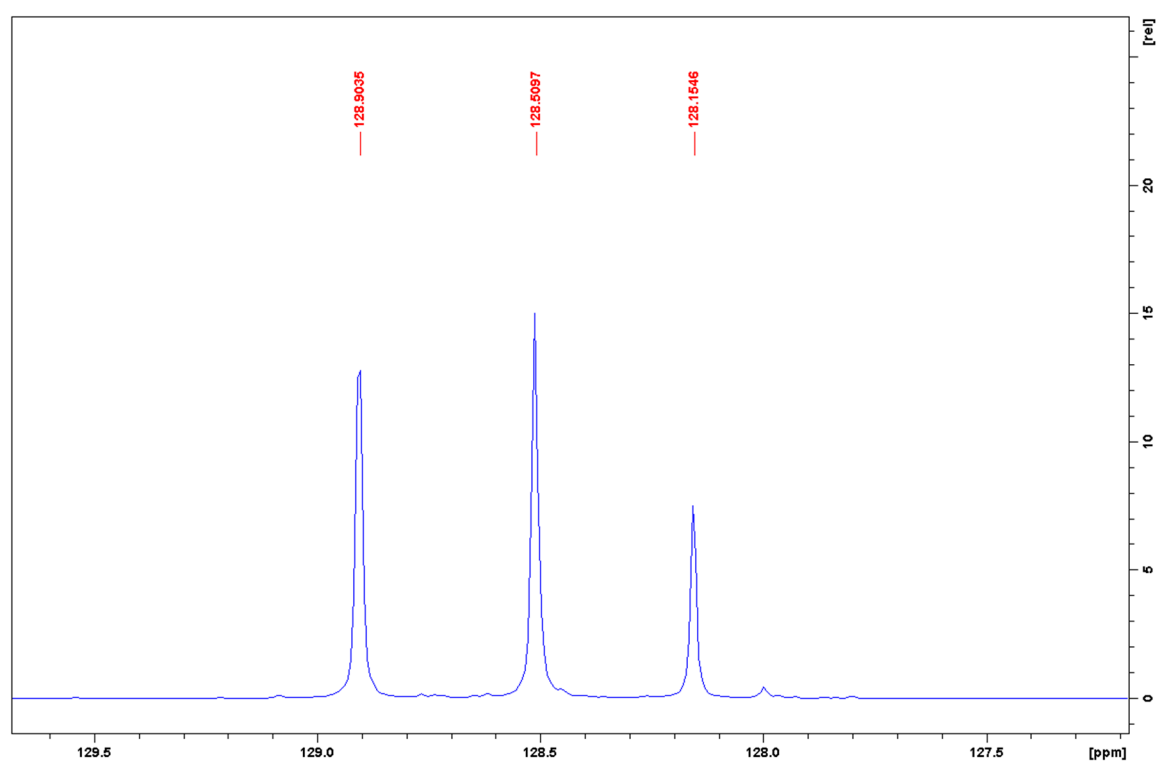

Figure S4.  $^{13}\text{C}$  NMR spectrum of 1 (Exp.).

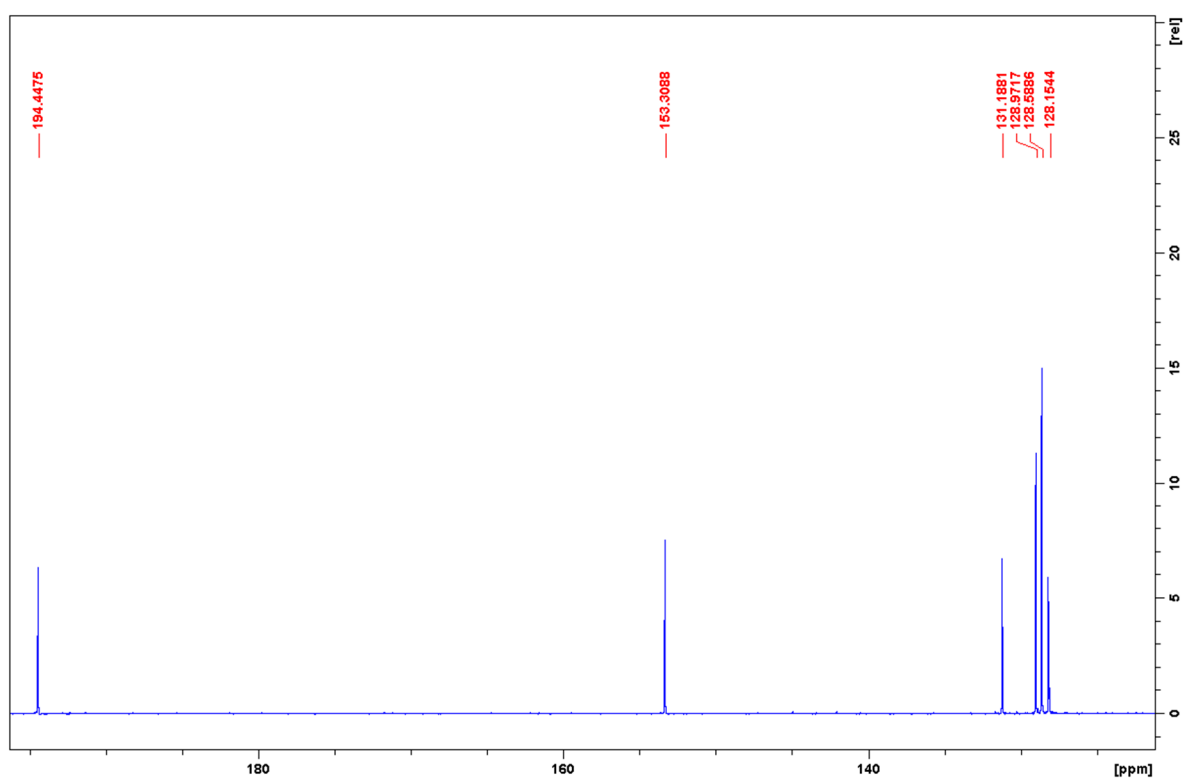

Figure S5. DEPT135 spectrum of 1.

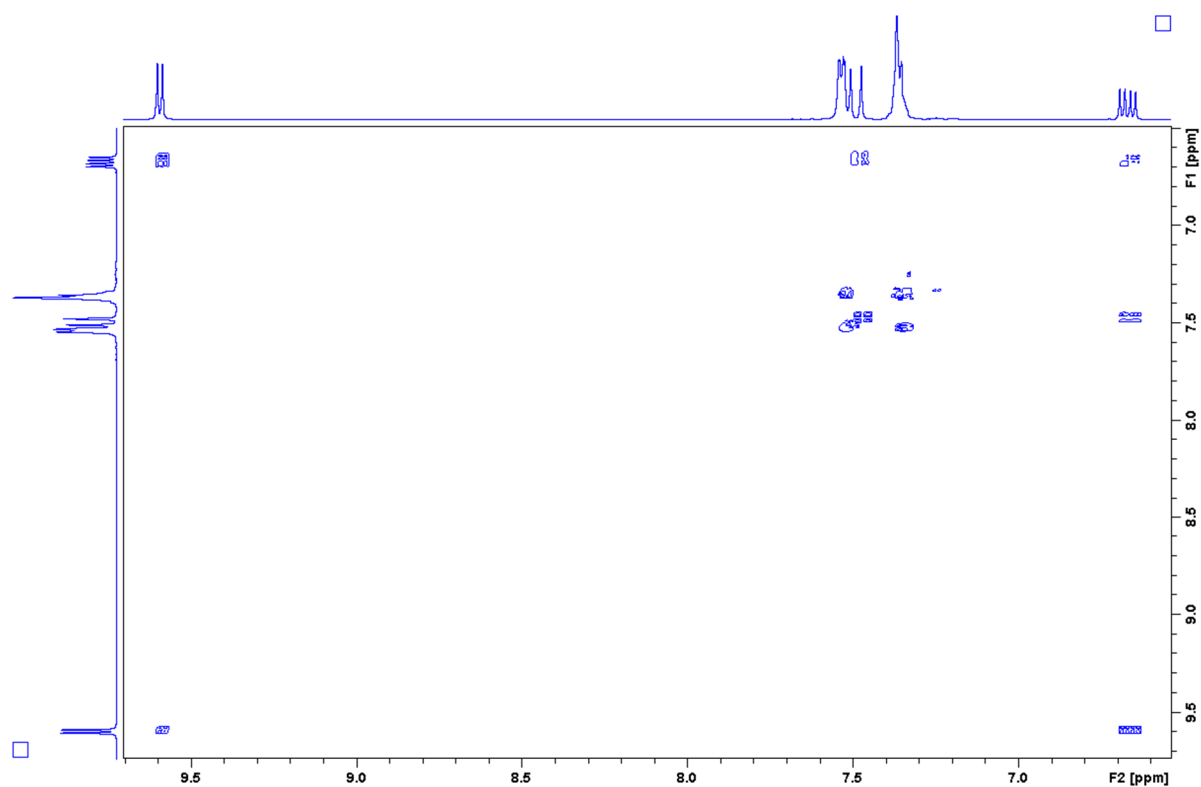

Figure S6. COSY spectrum of 1.

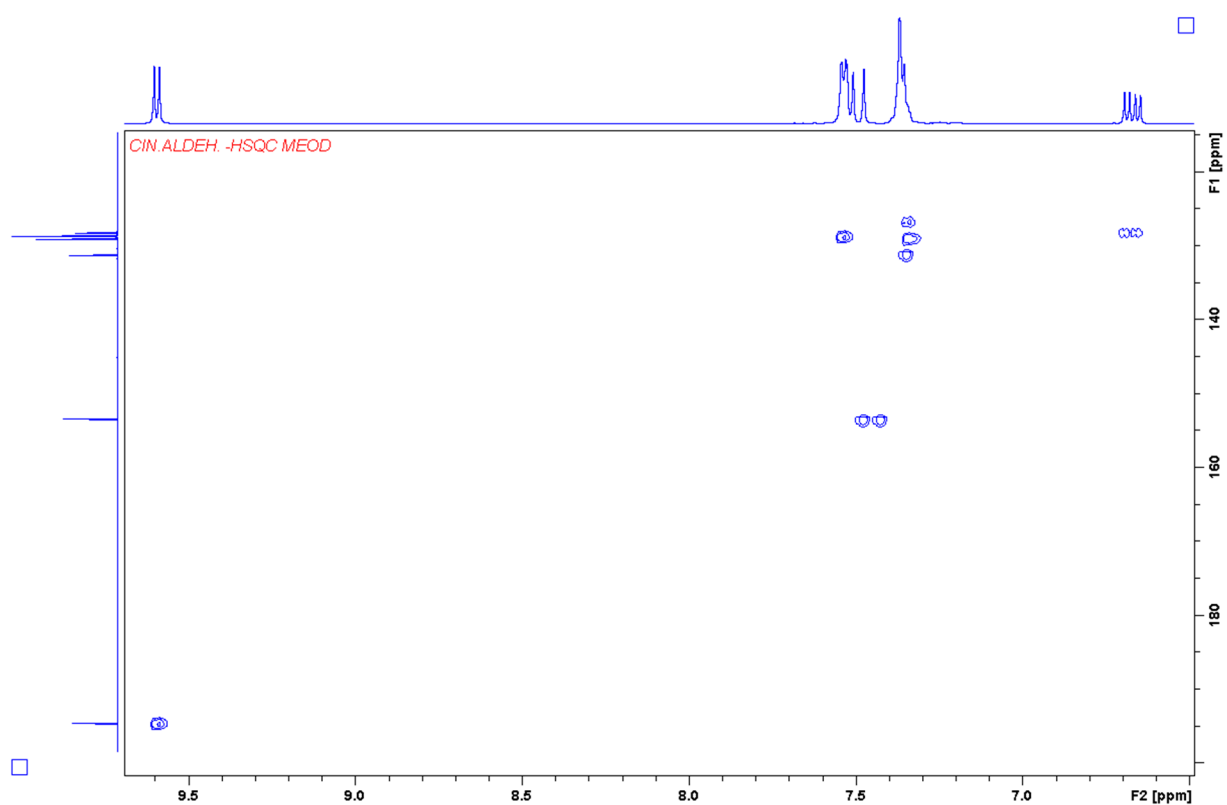

Figure S7. HSQC spectrum of **1**.

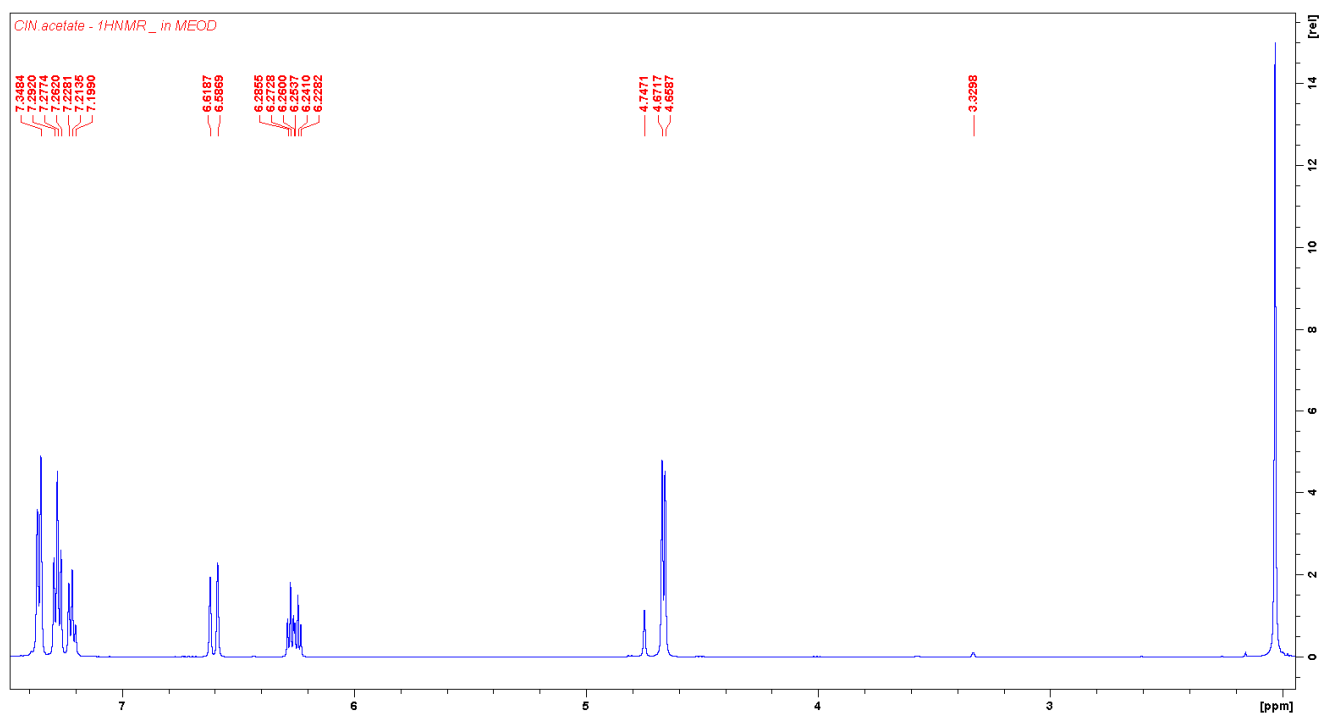

Figure S8.  $^1\text{H}$ NMR spectrum of 2.

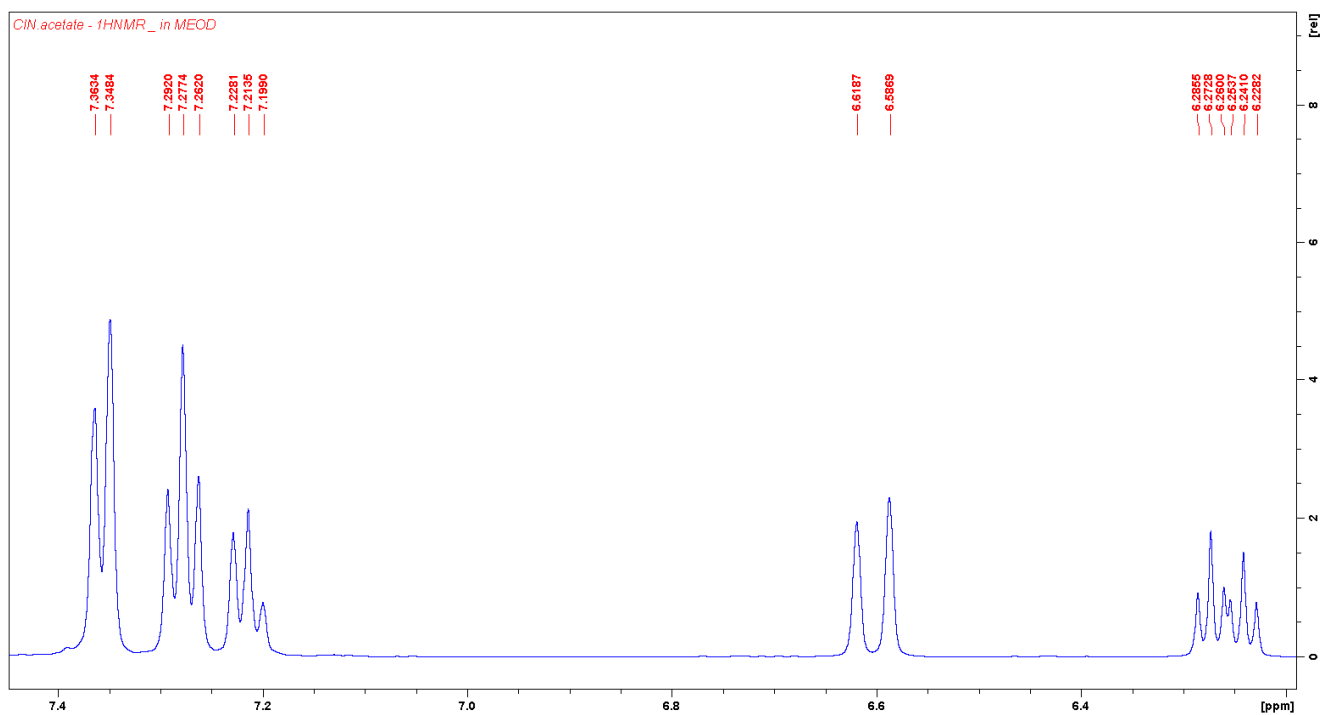

Figure S9.  $^1\text{H}$ NMR spectrum of 2 (Exp.).



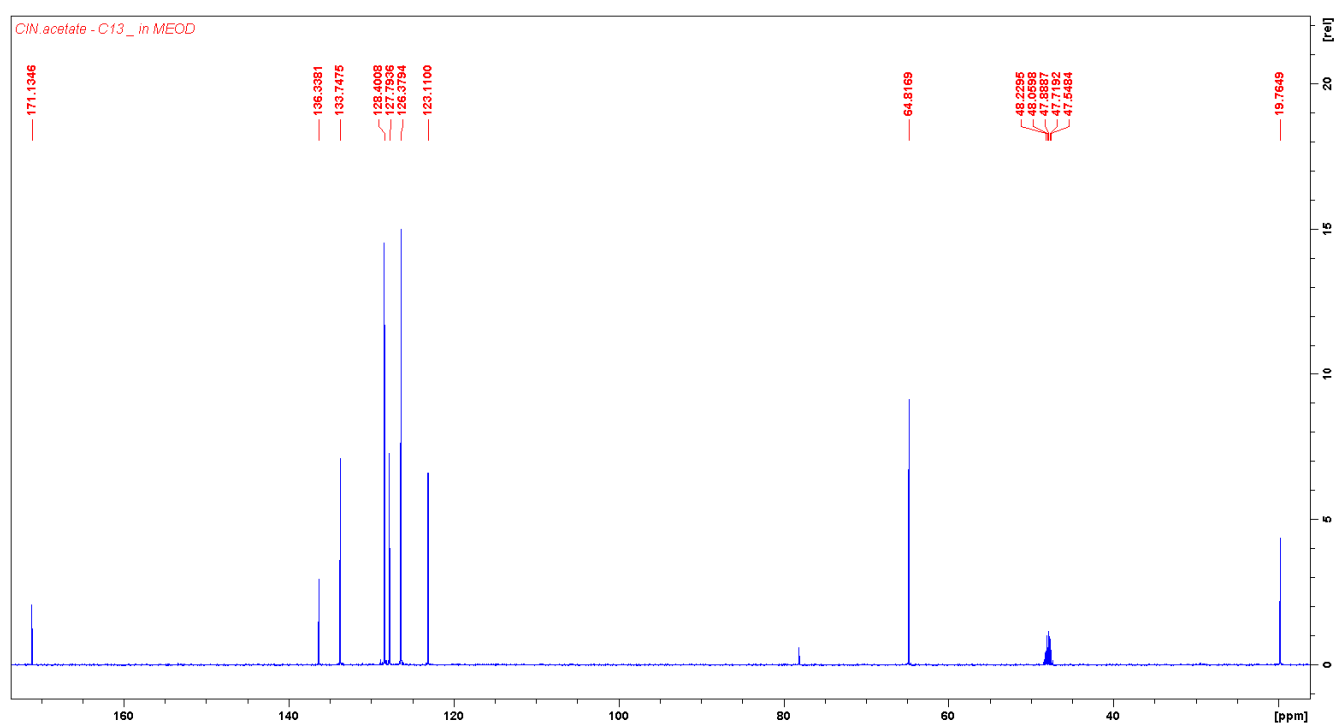

Figure S10.  $^{13}\text{C}$ NMR spectrum of 2.

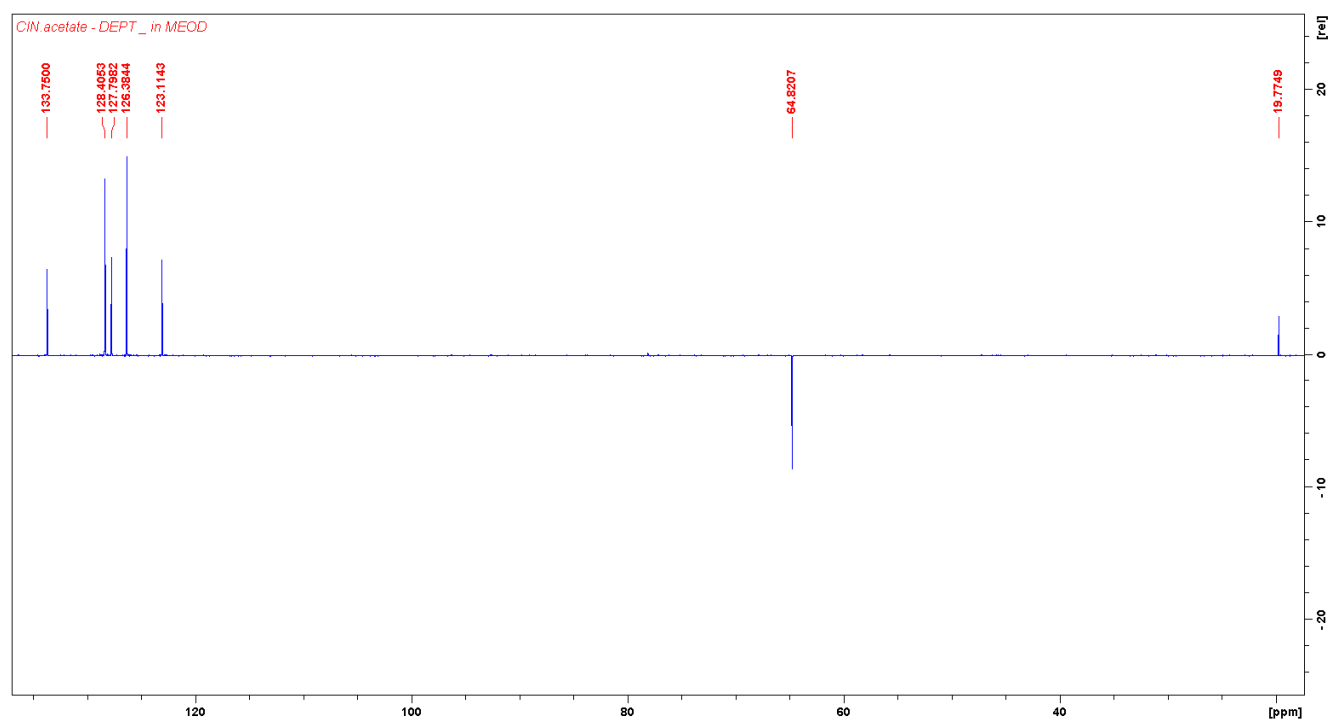

Figure S11. DEPT135 spectrum of 2.

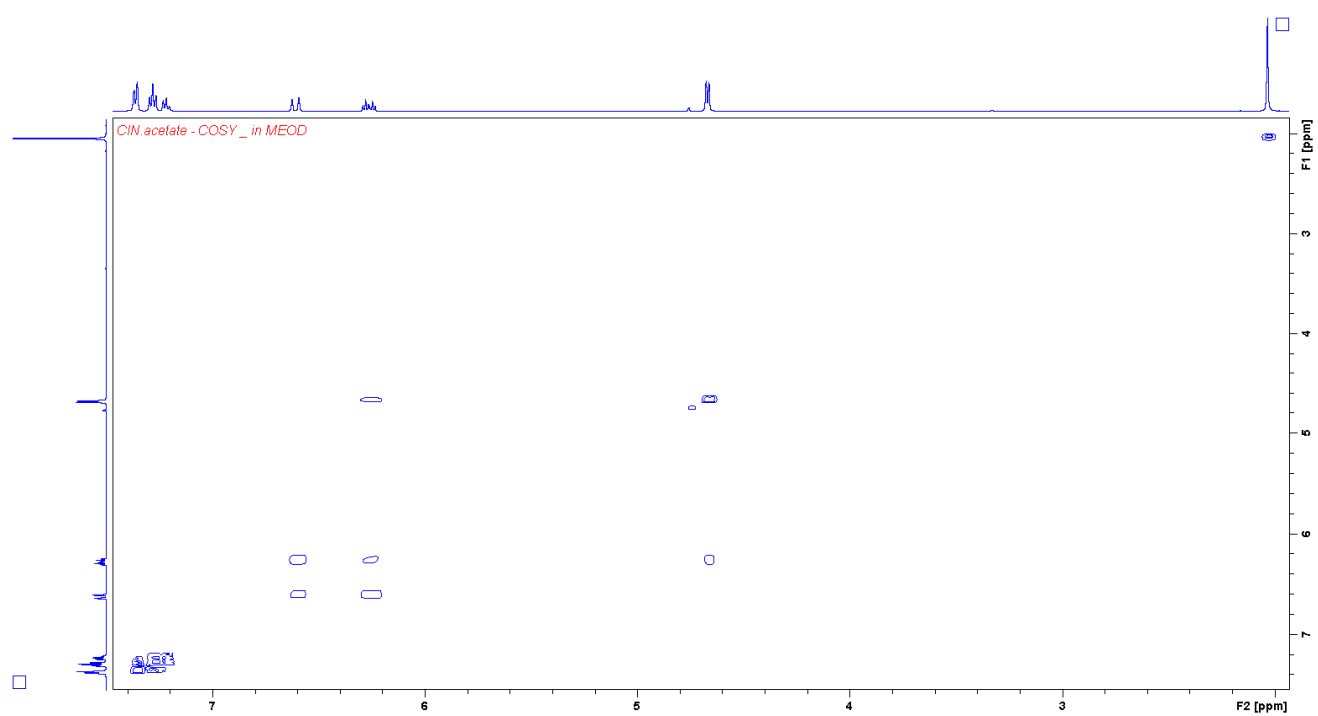

Figure S12. COSY spectrum of **2**.

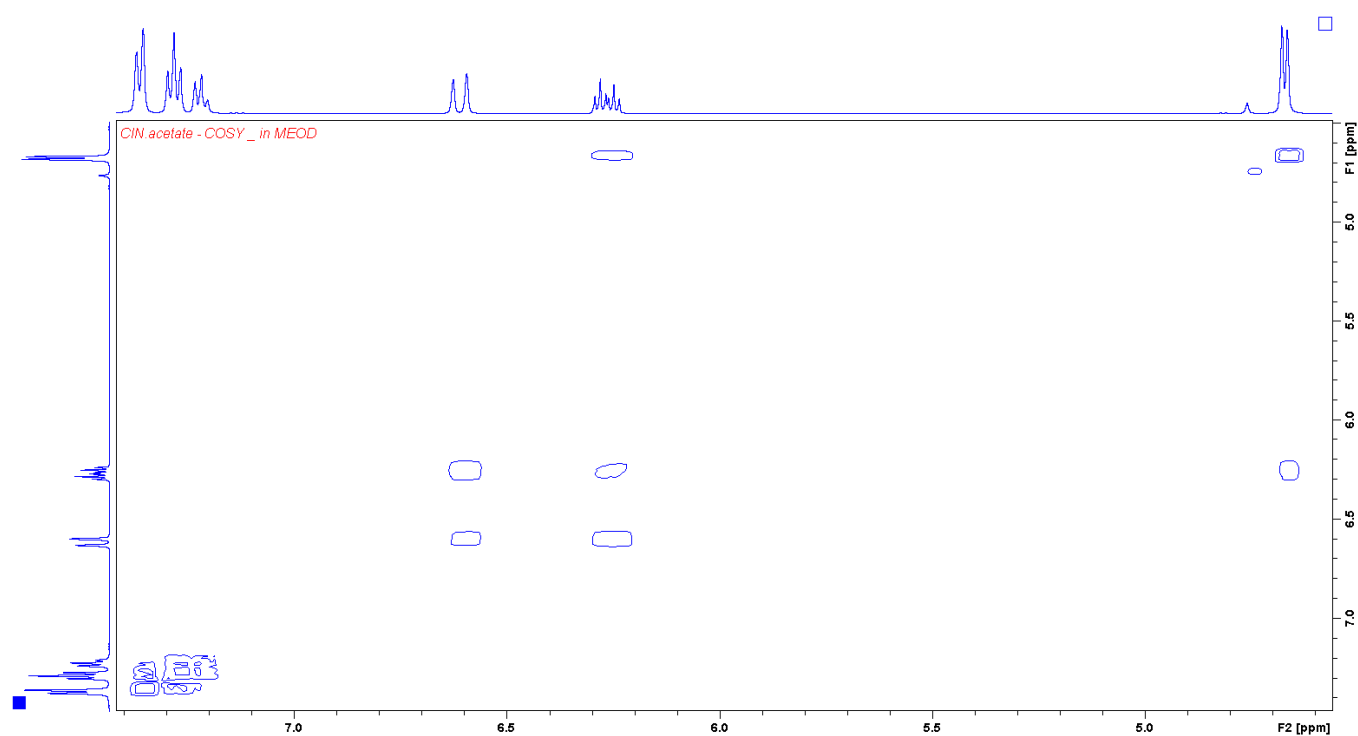

Figure S13. COSY spectrum of **2** (Exp.).

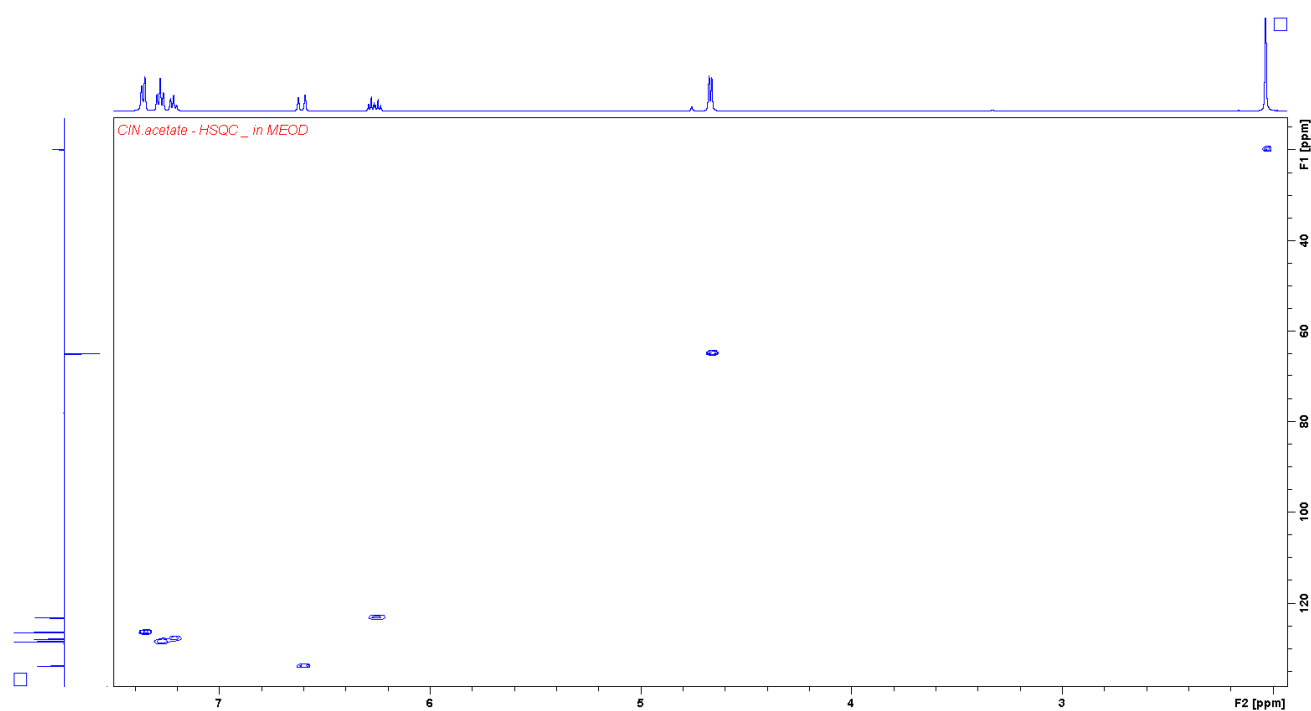

Figure S14. HSQC spectrum of 2.

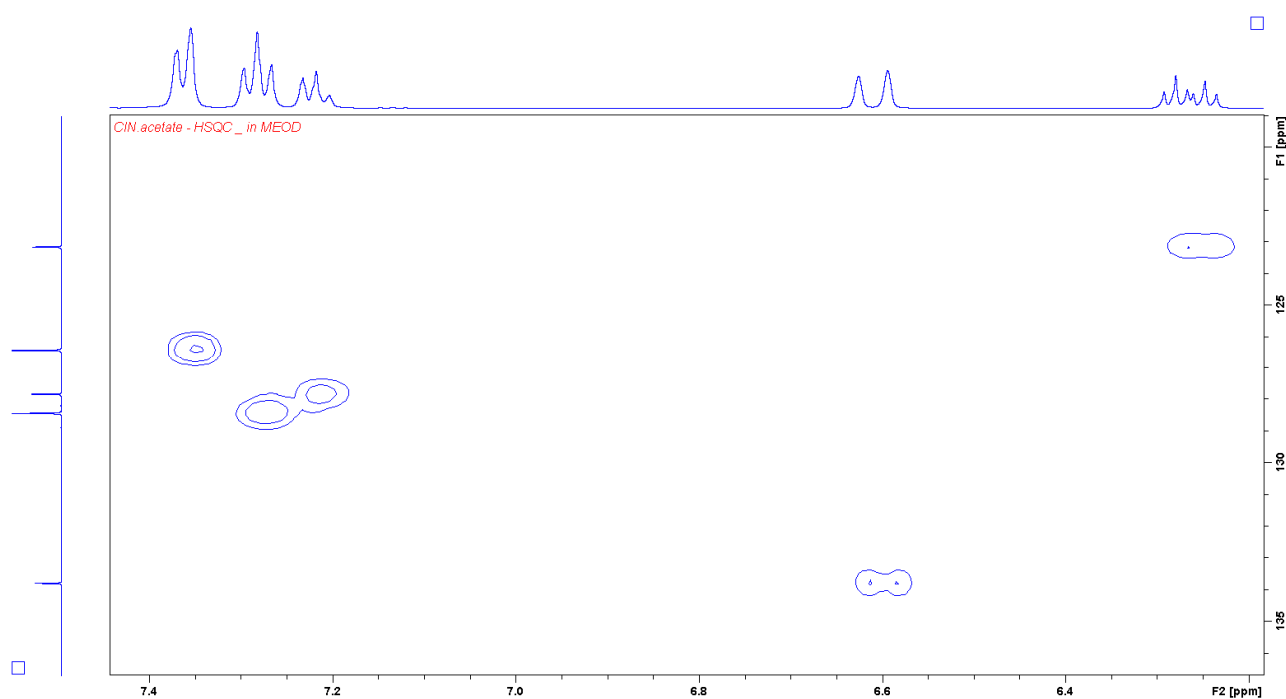

Figure S15. HSQC spectrum of 2 (Exp.).

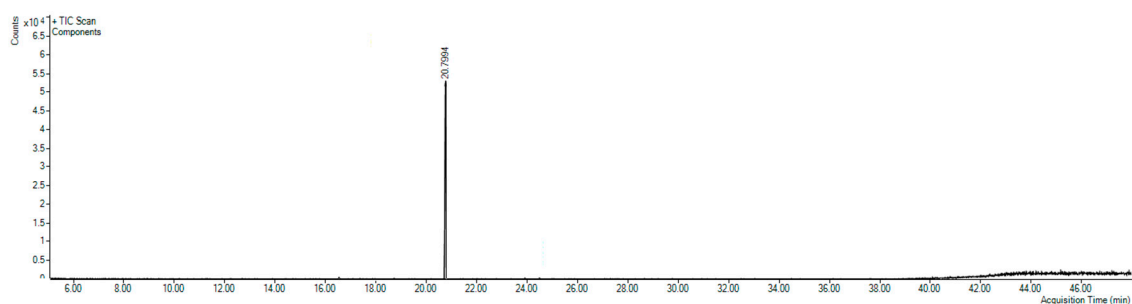

**Figure S16.** GC/FID chromatogram of **2**.

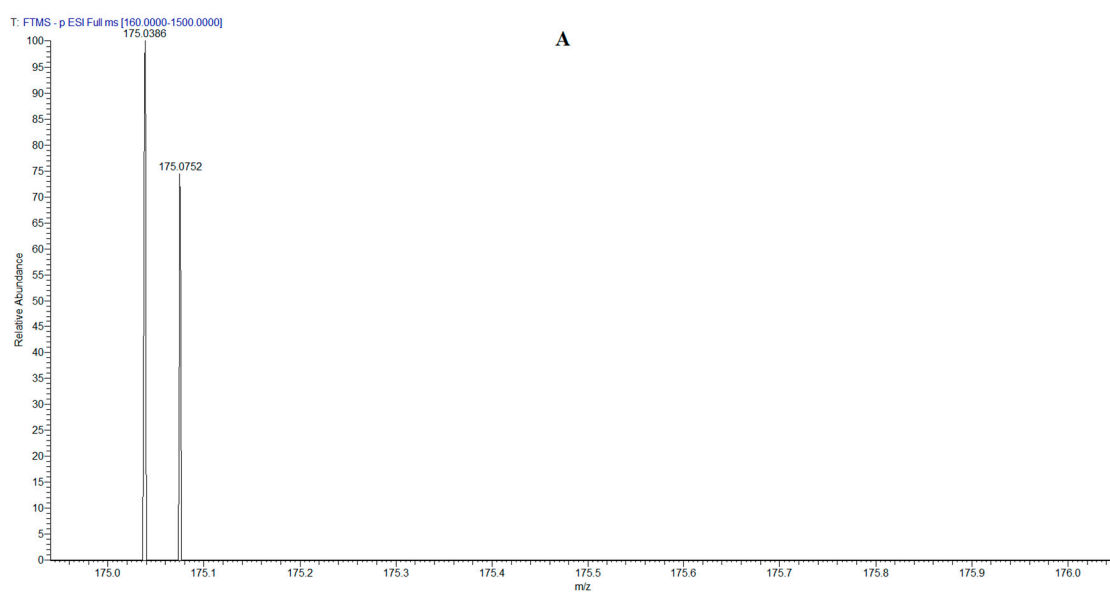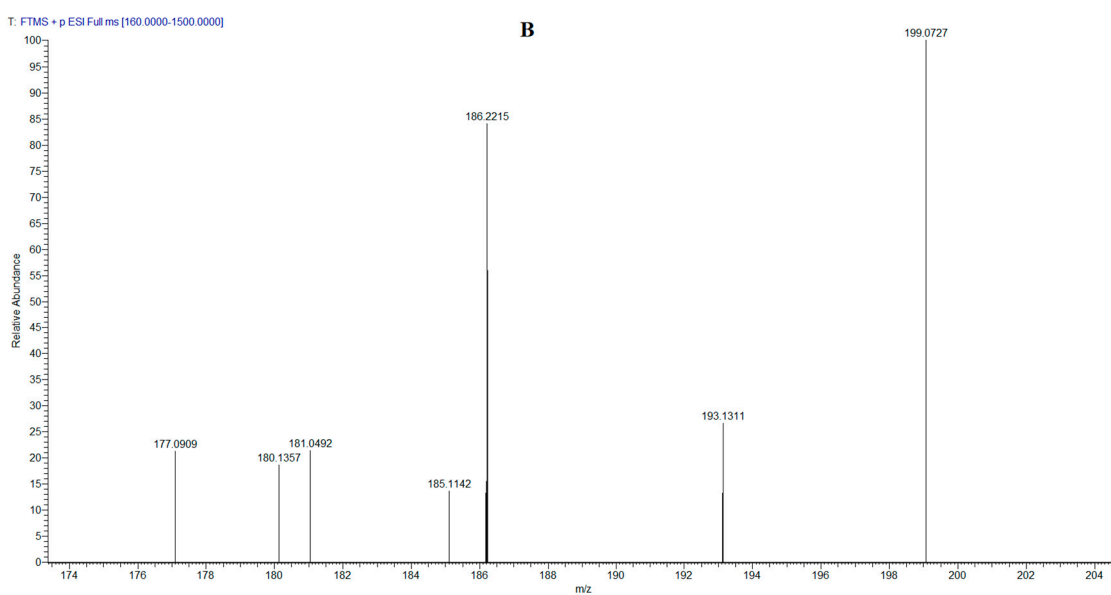

**Figure S17.** HRESIMS spectrum of **2** (A): Negative mode, (B): Positive mode.

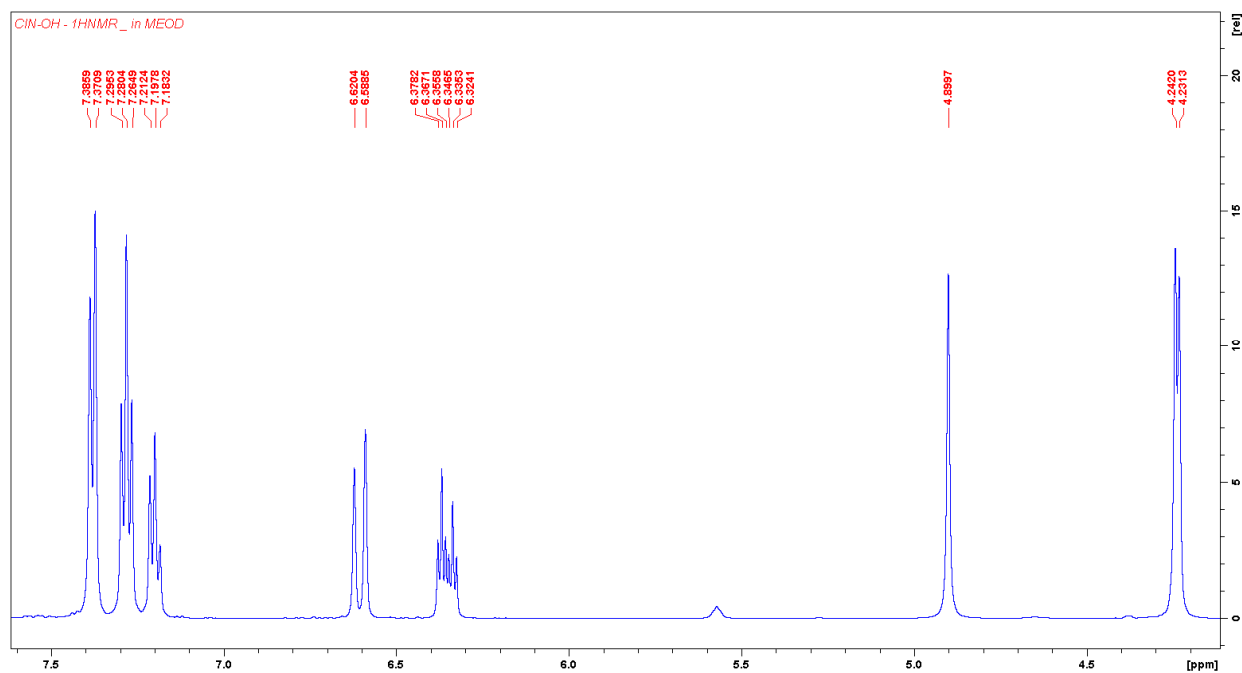

Figure S18.  $^1\text{H}$  NMR spectrum of 4.

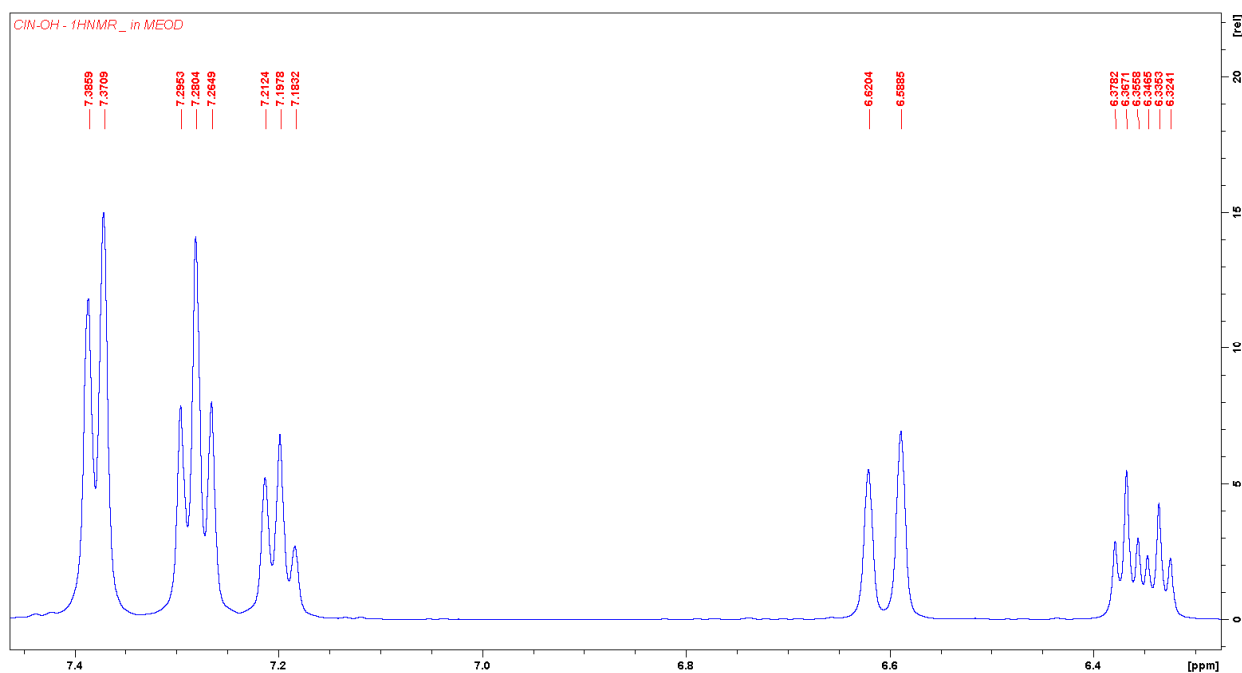

Figure S19.  $^1\text{H}$  NMR spectrum of 4 (Exp.).

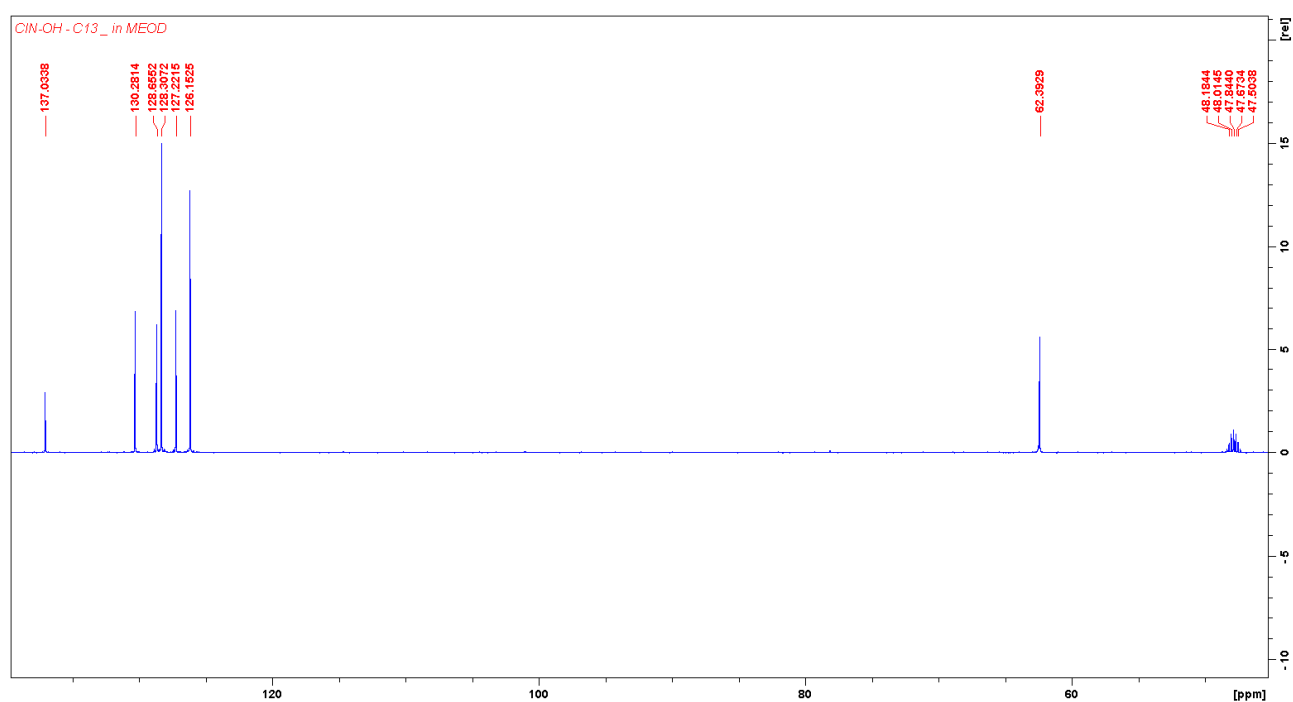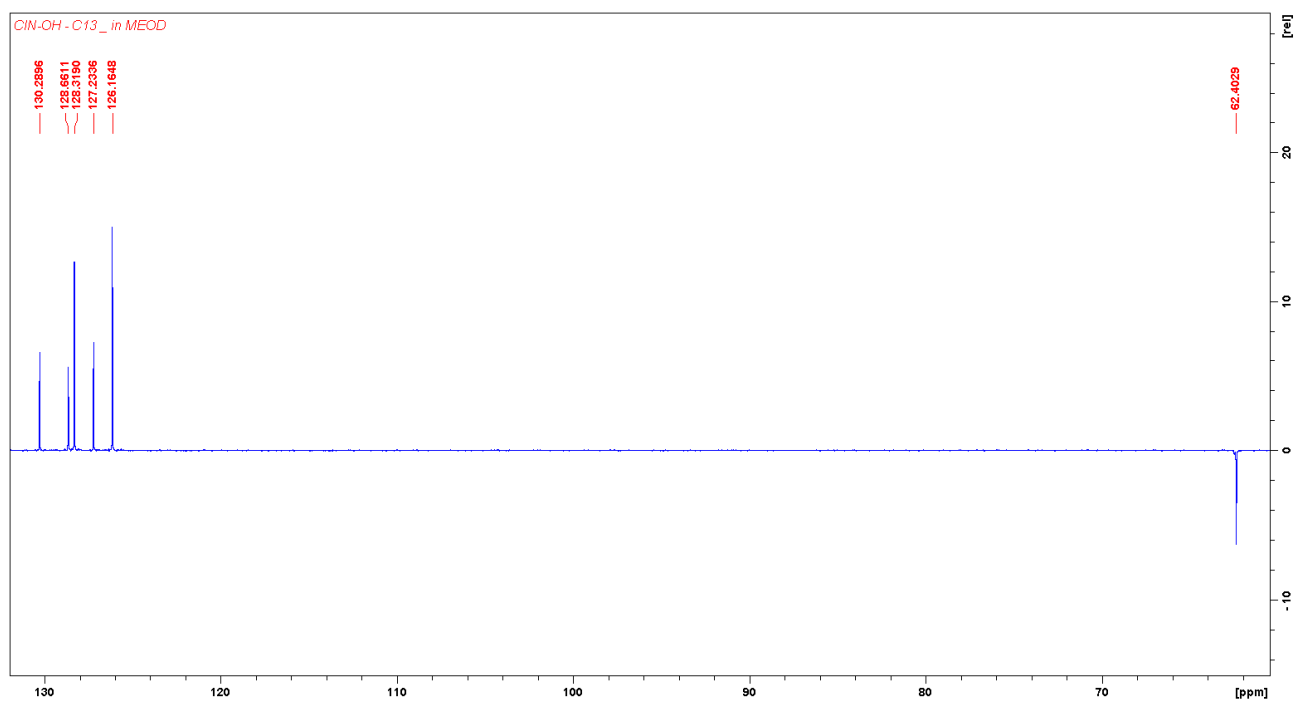

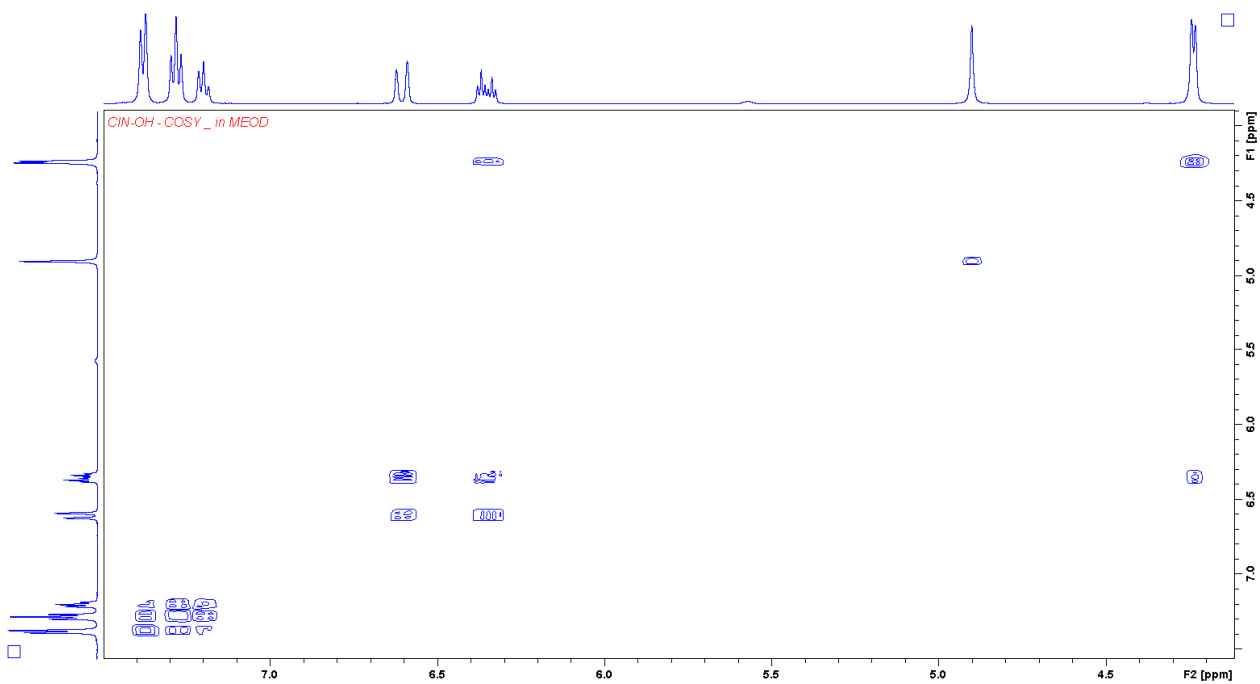

Figure S22. COSY spectrum of 4.

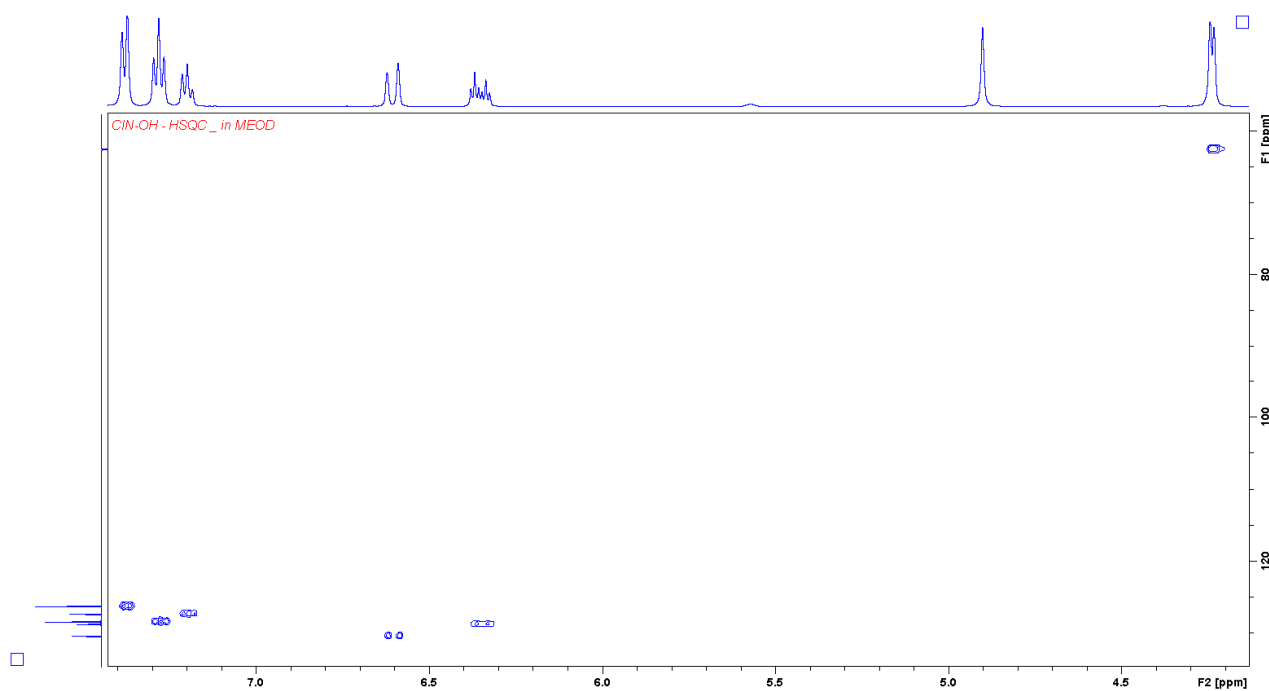

Figure S23. COSY spectrum of 4 (Exp.).

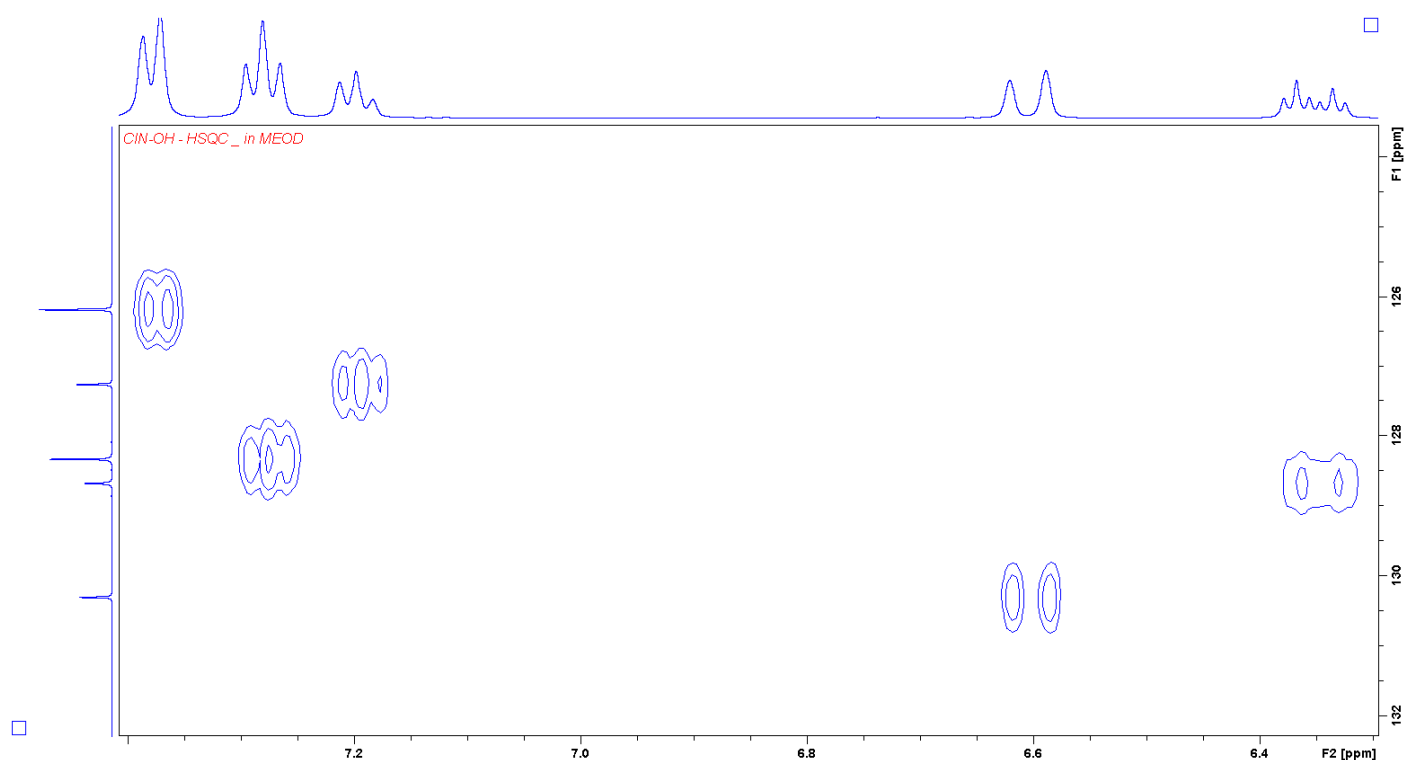

Figure S24. HSQC spectrum of 4.

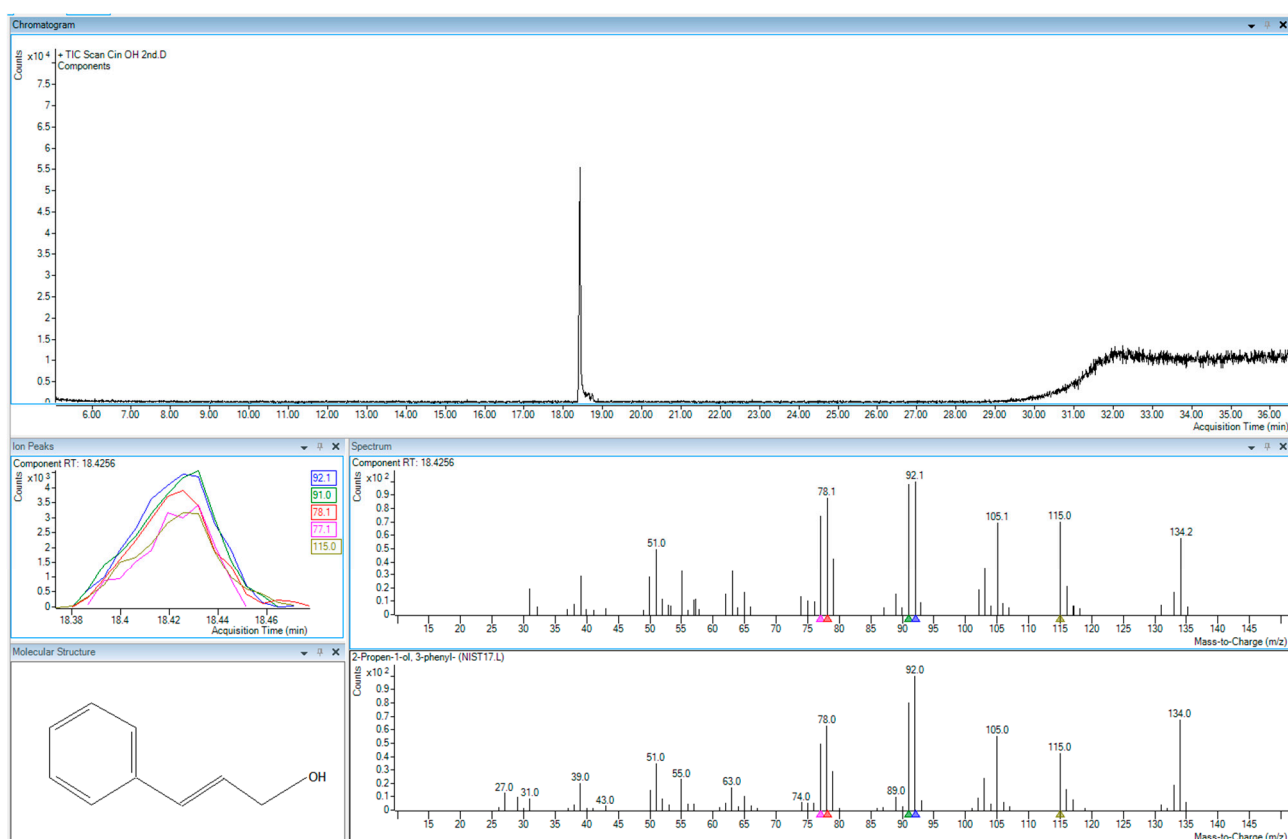

Figure S25. GC/MS spectrum of 4.
